# Supplementary material
Source: PubMed Central journal article supplement (PMC5472443)
Supplement: NIHMS847194-supplement-2.pdf [file NIHMS847194-supplement-2.pdf]

# Supplemental Figures and Legends

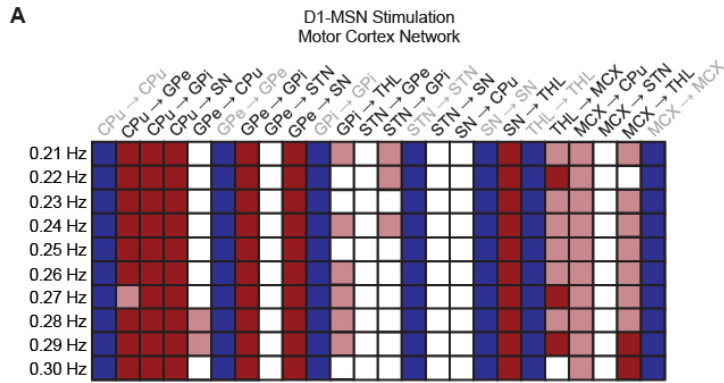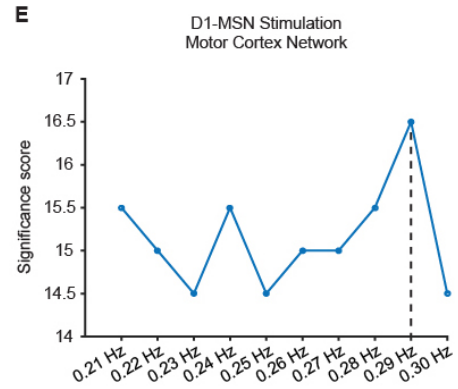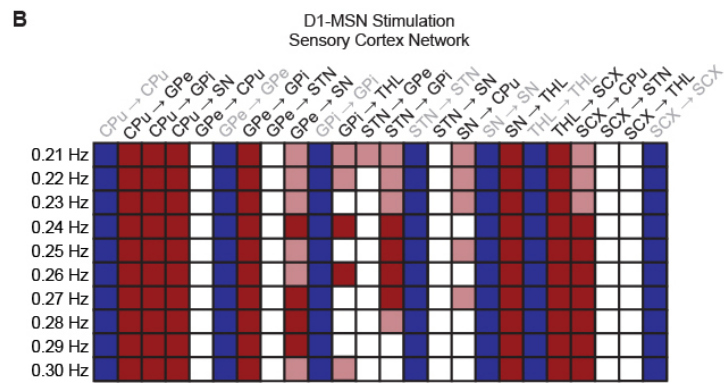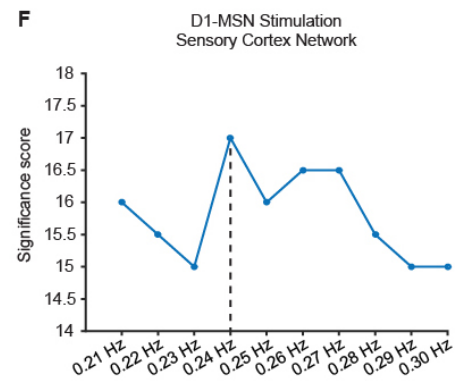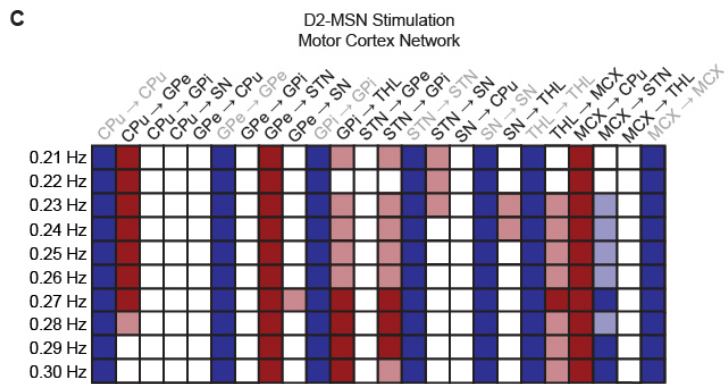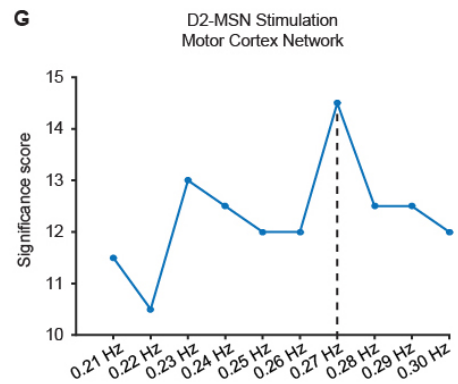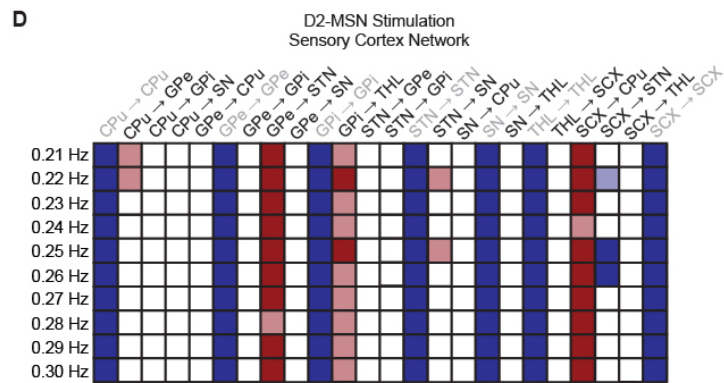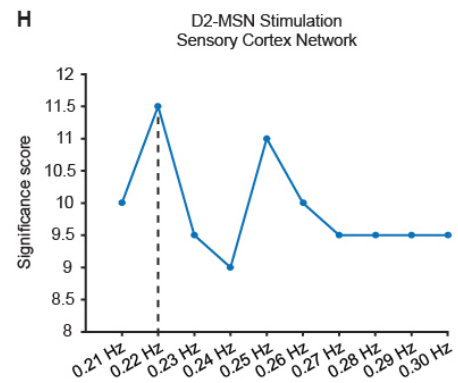

■ Significant      ■ Significant  
■ Close-to-significant      ■ Close-to-significant

**Figure S1, Related to Figures 3 and 4. Illustration of significant and close-to-significant connections during D1- and D2-MSN stimulations for the MCX and SCX network models at each cutoff frequency. A,B,** Significant and close-to-significant effective connections during D1-MSN stimulations for MCX and SCX network models, respectively. **C,D,** Significant and close-to-significant effective connections during D2-MSN stimulations for MCX and SCX network models, respectively. Substantial variability in the p-values of some connectivity estimates across cutoff frequencies was observed. In all panels, statistical significance was determined by testing effective connectivity strengths across subjects. Significant,  $P < 0.05$ ; Close-to-significant,  $P < 0.10$ . **E,F,** Weighted sum number of significant and close-to-significant connections during D1-MSN stimulations for MCX and SCX network models, respectively. The optimal cutoff frequencies, marked with a vertical dashed line, were 0.29 and 0.24 Hz, respectively. **G,H,** Weighted sum number of significant and close-to-significant connections during D2-MSN stimulations for MCX and SCX network models, respectively. The optimal cutoff frequencies, marked with a vertical dashed line, were 0.27 and 0.22 Hz, respectively.

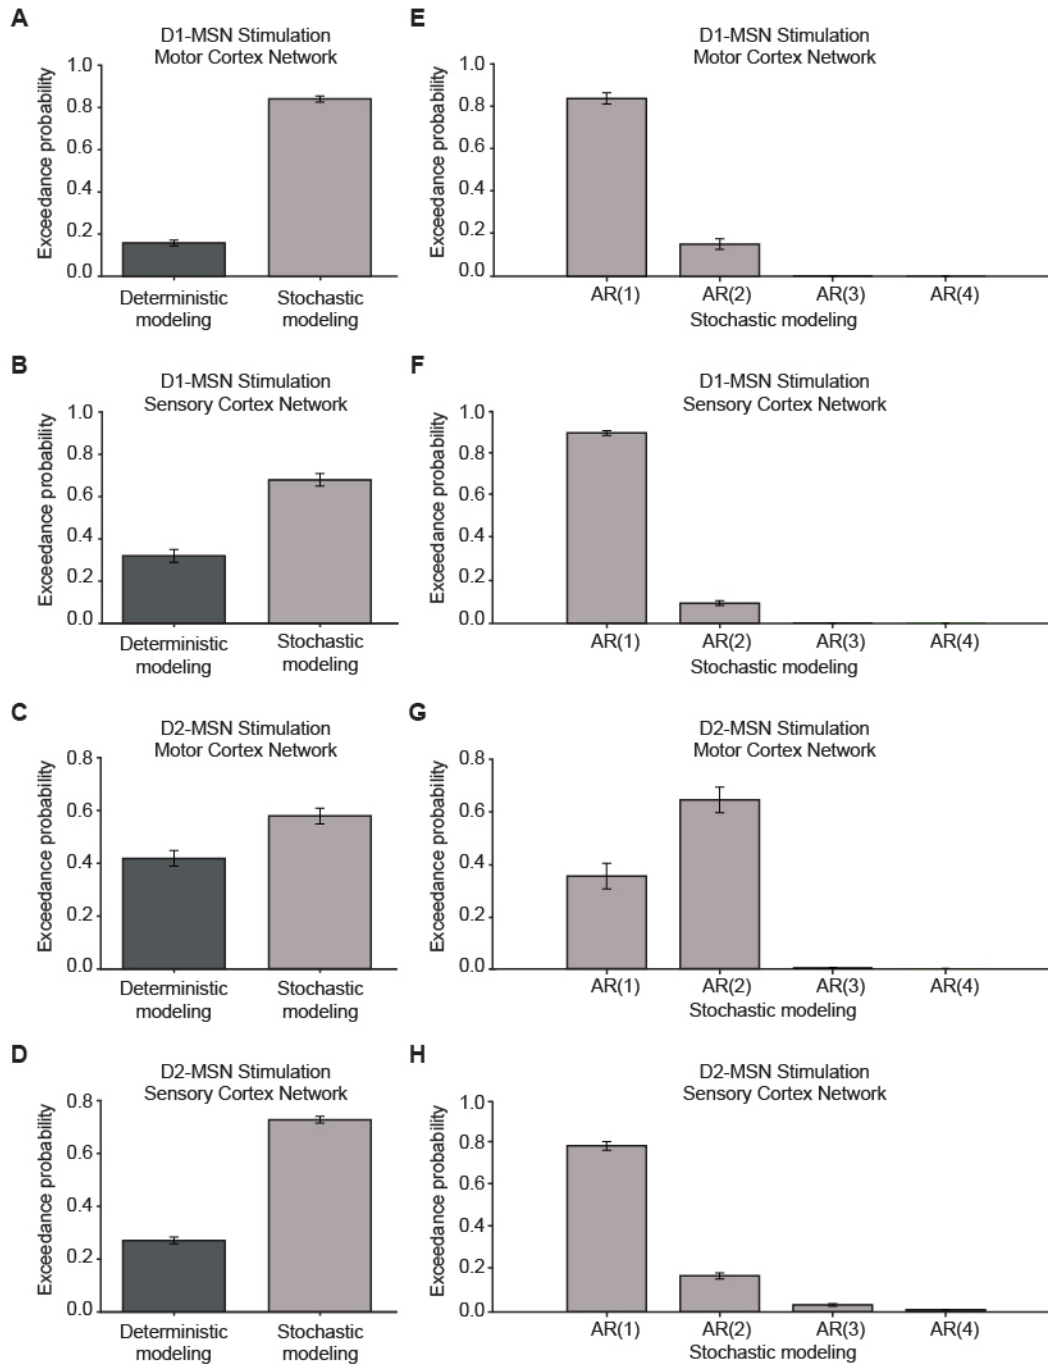

**Figure S2, Related to Figures 3 and 4. Comparison between deterministic and stochastic modeling and evaluation of autoregressive models under stochastic assumptions across cutoff frequencies. A-D, Comparison of model exceedance probabilities between deterministic and stochastic modeling. E-H, Illustrative comparison of model exceedance probabilities of**

autoregressive processes under stochastic assumptions. Error bars represent the standard error of the mean exceedance probabilities across cutoff frequencies.

## Supplemental Tables and Legends

**Table S1, Related to Figure 3. Connectivity estimates, 95% confidence intervals across subjects, and statistical significance levels for the D1-MSN simulation network model.**

Significant connections reflect the direct pathway. Asterisks indicate significant connectivity estimate after multiple comparison correction (\*  $P < 0.05$ , \*\*  $P < 0.005$ , \*\*\*  $P < 0.001$ ); “cts” indicates close-to-significant connectivity estimate after multiple comparison correction.

**Table S2, Related to Figure 4. Connectivity estimates, 95% confidence intervals across subjects, and statistical significance levels for the D2-MSN simulation network model.**

Significant connections reflect the indirect pathway. Asterisks indicate significant connectivity estimate after multiple comparison correction (\*  $P < 0.05$ , \*\*  $P < 0.005$ , \*\*\*  $P < 0.001$ ). “cts” indicates close-to-significant connectivity estimate after multiple comparison correction.

**Table S3, Related to Figure 5. Statistical comparisons of connectivity estimates between MCX and SCX network models.** No significant differences were observed. “cts” indicates close-to-significant difference after multiple comparison correction.

**Table S4, Related to Figure 6. Statistical comparisons of connectivity estimates between D1- and D2-MSN stimulation network models.** Asterisks indicate significant connectivity estimate after multiple comparison correction (\*  $P < 0.05$ , \*\*\*  $P < 0.001$ ). “cts” indicates close-to-significant difference after multiple comparison correction.

**Table S1**

|              |     | MCX network case                                                                 |     | SCX network case                                                                 |     |
|--------------|-----|----------------------------------------------------------------------------------|-----|----------------------------------------------------------------------------------|-----|
|              |     | Mean connectivity estimate; 95% CI<br>p-value (uncorrected); p-value (corrected) |     | Mean connectivity estimate; 95% CI<br>p-value (uncorrected); p-value (corrected) |     |
| <b>CPu</b> → | CPu | -1.8311; (-2.2770, -1.3852)<br>6.1654×10 <sup>-6</sup> ; 3.6572×10 <sup>-5</sup> | *** | -2.0250; (-2.4503, -1.5996)<br>1.4687×10 <sup>-6</sup> ; 1.1749×10 <sup>-5</sup> | *** |
|              | GPe | 0.4452; (0.1938, 0.6967)<br>0.0052; 0.0105                                       | *   | 0.4427; (0.2116, 0.6738)<br>0.0032; 0.0064                                       | *   |
|              | GPI | 0.9177; (0.4582, 1.3772)<br>0.0024; 0.0072                                       | *   | 0.8454; (0.4587, 1.2320)<br>0.0013; 0.0031                                       | **  |
|              | SN  | 0.9155; (0.6875, 1.1434)<br>7.6191×10 <sup>-6</sup> ; 3.6572×10 <sup>-5</sup>    | *** | 0.9399; (0.6829, 1.1969)<br>1.8248×10 <sup>-5</sup> ; 8.7588×10 <sup>-5</sup>    | *** |
| <b>GPe</b> → | CPu | -0.1600; (-0.3136, -0.0063)<br>0.0661; 0.0881                                    | cts | -0.0373; (-0.2004, 0.1259)<br>0.6629; 0.6917                                     |     |
|              | GPe | -0.4998; (-0.7680, -0.2316)<br>0.0038; 0.0091                                    | *   | -0.6057; (-0.8513, -0.3601)<br>5.2449×10 <sup>-5</sup> ; 0.0014                  | **  |
|              | GPI | 0.6377; (0.3084, 0.9669)<br>0.0030; 0.0079                                       | *   | 0.5441; (0.2527, 0.8356)<br>0.0038; 0.0069                                       | *   |
|              | STN | 0.1856; (-0.8987, 1.2699)<br>0.7436; 0.7759                                      |     | 0.3338; (-0.3962, 1.0637)<br>0.3893; 0.4672                                      |     |
|              | SN  | 0.4556; (0.1680, 0.7432)<br>0.0100; 0.0185                                       | *   | 0.3718; (0.0980, 0.6455)<br>0.0221; 0.0354                                       | *   |
| <b>GPI</b> → | GPI | -1.0409; (-1.1571, -0.9247)<br>2.1503×10 <sup>-9</sup> ; 5.1608×10 <sup>-8</sup> | *** | -0.9750; (-1.0904, -0.8596)<br>4.0113×10 <sup>-9</sup> ; 9.6271×10 <sup>-8</sup> | *** |
|              | THL | 0.1555; (0.0073, 0.3036)<br>0.0643; 0.0881                                       | cts | 0.1711; (0.0656, 0.2767)<br>0.0088; 0.0151                                       | *   |
| <b>STN</b> → | GPe | 0.0469; (-0.1462, 0.2401)<br>0.6433; 0.7018                                      |     | 0.1388; (-0.1044, 0.3820)<br>0.2870; 0.3827                                      |     |
|              | GPI | 0.2240; (-0.0406, 0.4886)<br>0.1253; 0.1583                                      |     | 0.1891; (0.0438, 0.3344)<br>0.0270; 0.0381                                       | *   |
|              | STN | -0.4161; (-0.6129, -0.2193)<br>0.0016; 0.0056                                    | *   | -0.5330; (-0.7170, -0.3490)<br>1.4307×10 <sup>-4</sup> ; 4.9052×10 <sup>-4</sup> | *** |
|              | SN  | -0.0732; (-0.2576, 0.1112)<br>0.4528; 0.5434                                     |     | -0.0524; (-0.1891, 0.0843)<br>0.4684; 0.5110                                     |     |
| <b>SN</b> →  | CPu | 0.0603; (-0.0996, 0.2201)<br>0.4754; 0.5434                                      |     | 0.0654; (-0.0931, 0.2239)<br>0.4356; 0.4979                                      |     |
|              | SN  | -0.7379; (-0.8627, -0.6132)<br>1.6497×10 <sup>-7</sup> ; 1.9796×10 <sup>-6</sup> | *** | -0.7935; (-0.9694, -0.6177)<br>2.4906×10 <sup>-6</sup> ; 1.4944×10 <sup>-5</sup> | *** |
|              | THL | 0.4234; (0.1895, 0.6574)<br>0.0046; 0.0100                                       | *   | 0.4704; (0.3250, 0.6157)<br>5.4974×10 <sup>-5</sup> ; 2.1989×10 <sup>-4</sup>    | *** |
| <b>THL</b> → | THL | -1.0242; (-1.3371, -0.7113)<br>4.9756×10 <sup>-5</sup> ; 1.9902×10 <sup>-4</sup> | *** | -0.9839; (-1.3499, -0.6180)<br>2.6444×10 <sup>-4</sup> ; 7.9332×10 <sup>-4</sup> | *** |
|              | CTX | 0.3166; (0.0718, 0.5615)<br>0.0278; 0.0444                                       | *   | 0.4666; (0.2293, 0.7038)<br>0.0027; 0.0058                                       | *   |
| <b>CTX</b> → | CPu | 0.5521; (0.1054, 0.9987)<br>0.0338; 0.0508                                       | cts | 0.4752; (0.1183, 0.8320)<br>0.0243; 0.0364                                       | *   |
|              | STN | 0.0840; (-0.6121, 0.7801)<br>0.8174; 0.8174                                      |     | 0.3577; (-0.4231, 1.1386)<br>0.3884; 0.4672                                      |     |
|              | THL | 0.2790; (0.0740, 0.4841)<br>0.0219; 0.0376                                       | *   | -0.0041; (-0.2459, 0.2378)<br>0.9743; 0.9743                                     |     |
|              | CTX | -1.4466; (-1.7381, -1.1551)<br>6.2848×10 <sup>-8</sup> ; 7.7978×10 <sup>-6</sup> | *** | -1.5191; (-1.8306, -1.2077)<br>1.1564×10 <sup>-6</sup> ; 1.1749×10 <sup>-5</sup> | *** |

**Table S2**

|              |     | MCX network case                                                                 |     | SCX network case                                                                 |     |
|--------------|-----|----------------------------------------------------------------------------------|-----|----------------------------------------------------------------------------------|-----|
|              |     | Mean connectivity estimate; 95% CI<br>p-value (uncorrected); p-value (corrected) |     | Mean connectivity estimate; 95% CI<br>p-value (uncorrected); p-value (corrected) |     |
| <b>CPu</b> → | CPu | -0.8046; (-0.9642, -0.6449)<br>3.9715×10 <sup>-6</sup> ; 3.1772×10 <sup>-5</sup> | *** | -1.0184; (-1.2866, -0.7503)<br>3.9189×10 <sup>-5</sup> ; 3.1351×10 <sup>-4</sup> | *** |
|              | GPe | 0.3089; (0.0794, 0.5383)<br>0.0270; 0.0496                                       | *   | 0.2288; (0.0471, 0.4106)<br>0.0357; 0.0779                                       | cts |
|              | GPi | 0.0025; (-0.2688, 0.2739)<br>0.9858; 0.9858                                      |     | -0.0480; (-0.2823, 0.1863)<br>0.6972; 0.7605                                     |     |
|              | SN  | 0.1026; (-0.0740, 0.2791)<br>0.2842; 0.3248                                      |     | 0.2217; (-0.0499, 0.4934)<br>0.1441; 0.2162                                      |     |
| <b>GPe</b> → | CPu | -0.0667; (-0.3817, 0.2482)<br>0.6876; 0.7175                                     |     | 0.2133; (-0.3528, 0.7793)<br>0.4791; 0.5717                                      |     |
|              | GPe | -1.0799; (-1.3777, -0.7843)<br>5.3007×10 <sup>-5</sup> ; 2.1203×10 <sup>-4</sup> | *** | -1.1032; (-1.5031, -0.7033)<br>4.2923×10 <sup>-4</sup> ; 0.0021                  | **  |
|              | GPi | 0.3015; (-0.0431, 0.6462)<br>0.1206; 0.1702                                      |     | 0.3018; (-0.0959, 0.6995)<br>0.1711; 0.2416                                      |     |
|              | STN | 1.1176; (0.7550, 1.4803)<br>1.9270×10 <sup>-4</sup> ; 5.7809×10 <sup>-4</sup>    | *** | 0.9814; (0.6392, 1.3237)<br>3.2561×10 <sup>-4</sup> ; 0.0020                     | **  |
|              | SN  | 0.3551; (0.0394, 0.6708)<br>0.0549; 0.0878                                       | cts | 0.2822; (-0.0241, 0.5885)<br>0.1044; 0.1671                                      |     |
| <b>GPi</b> → | GPi | -1.1923; (-1.3635, -1.0211)<br>2.5518×10 <sup>-7</sup> ; 6.1242×10 <sup>-6</sup> | *** | -1.2649; (-1.4559, -1.0740)<br>3.9263×10 <sup>-7</sup> ; 9.4231×10 <sup>-6</sup> | *** |
|              | THL | 0.4156; (0.1288, 0.7025)<br>0.0194; 0.0466                                       | *   | 0.4196; (0.1374, 0.7018)<br>0.0172; 0.0413                                       | *   |
| <b>STN</b> → | GPe | -0.0576; (-0.2922, 0.1776)<br>0.6439; 0.7024                                     |     | -0.0291; (-0.2946, 0.2363)<br>0.8346; 0.8346                                     |     |
|              | GPi | 0.4254; (0.1257, 0.7251)<br>0.0213; 0.0466                                       | *   | 0.3710; (0.0116, 0.7303)<br>0.0737; 0.1263                                       |     |
|              | STN | -0.7868; (-0.9784, -0.5952)<br>2.1061×10 <sup>-5</sup> ; 1.0109×10 <sup>-4</sup> | *** | -0.8004; (-1.1243, -0.4766)<br>9.1604×10 <sup>-4</sup> ; 0.0037                  | **  |
|              | SN  | 0.1889; (-0.0245, 0.4023)<br>0.1167; 0.1702                                      |     | 0.2563; (0.0459, 0.4667)<br>0.0407; 0.0815                                       | cts |
| <b>SN</b> →  | CPu | -0.1803; (-0.4899, 1.293)<br>0.2832; 0.3248                                      |     | -0.1148; (-0.3202, 0.0906)<br>0.3017; 0.3811                                     |     |
|              | SN  | -1.2963; (-1.5479, -1.0447)<br>3.2999×10 <sup>-6</sup> ; 3.1772×10 <sup>-5</sup> | *** | -2.0027; (-2.8539, -1.1516)<br>0.0013; 0.0044                                    | **  |
|              | THL | 0.1981; (-0.0347, 0.4310)<br>0.1297; 0.1730                                      |     | 0.0733; (-0.4318, 0.5783)<br>0.7826; 0.8166                                      |     |
| <b>THL</b> → | THL | -1.0121; (-1.3126, -0.7116)<br>9.9123×10 <sup>-5</sup> ; 3.3985×10 <sup>-4</sup> | *** | -0.9573; (-1.3914, -0.5232)<br>0.0019; 0.0058                                    | *   |
|              | CTX | 0.4221; (0.1034, 0.7407)<br>0.0289; 0.0496                                       | *   | 0.2764; (-0.1442, 0.6970)<br>0.2299; 0.3065                                      |     |
| <b>CTX</b> → | CPu | 0.6985; (0.2363, 1.1607)<br>0.0159; 0.0424                                       | *   | 0.7798; (0.2949, 1.2647)<br>0.0117; 0.0312                                       | *   |
|              | STN | -0.6773; (-1.1879, -0.1667)<br>0.0287; 0.0496                                    | *   | -0.6833; (-1.2871, -0.0796)<br>0.0537; 0.0992                                    | cts |
|              | THL | -0.2594; (-0.5950, 0.0763)<br>0.1642; 0.2074                                     |     | 0.1017; (-0.1822, 0.3857)<br>0.5002; 0.5717                                      |     |
|              | CTX | -1.2685; (-1.5615, -0.9754)<br>1.3802×10 <sup>-5</sup> ; 8.2811×10 <sup>-5</sup> | *** | -2.4844; (-3.1139, -1.8550)<br>2.8920×10 <sup>-5</sup> ; 3.1351×10 <sup>-4</sup> | *** |

**Table S3**

|              |     | MCX vs. SCX network case (D1-MSN Stim.)    | MCX vs. SCX network case (D2-MSN Stim.)    |                |     |
|--------------|-----|--------------------------------------------|--------------------------------------------|----------------|-----|
|              |     | p-value (uncorrected); p-value (corrected) | p-value (uncorrected); p-value (corrected) |                |     |
| <b>CPu</b> → | CPu | 0.6685; 0.9899                             |                                            | 0.1959; 0.9992 |     |
|              | GPe | 0.8807; 0.9899                             |                                            | 0.5985; 0.9992 |     |
|              | GPi | 0.5870; 0.9899                             |                                            | 0.7853; 0.9992 |     |
|              | SN  | 0.7702; 0.9899                             |                                            | 0.4802; 0.9992 |     |
| <b>GPe</b> → | CPu | 0.5951; 0.9899                             |                                            | 0.4080; 0.9992 |     |
|              | GPe | 0.9268; 0.9899                             |                                            | 0.9278; 0.9992 |     |
|              | GPi | 0.9412; 0.9899                             |                                            | 0.9992; 0.9992 |     |
|              | STN | 0.8991; 0.9899                             |                                            | 0.5989; 0.9992 |     |
|              | SN  | 0.9558; 0.9899                             |                                            | 0.7490; 0.9992 |     |
| <b>GPi</b> → | GPi | 0.6741; 0.9899                             |                                            | 0.5856; 0.9992 |     |
|              | THL | 0.9722; 0.9899                             |                                            | 0.9850; 0.9992 |     |
| <b>STN</b> → | GPe | 0.7739; 0.9899                             |                                            | 0.8778; 0.9992 |     |
|              | GPi | 0.4432; 0.9899                             |                                            | 0.8223; 0.9992 |     |
|              | STN | 0.6519; 0.9899                             |                                            | 0.9441; 0.9992 |     |
|              | SN  | 0.7721; 0.9899                             |                                            | 0.6646; 0.9992 |     |
| <b>SN</b> →  | CPu | 0.6202; 0.9899                             |                                            | 0.7338; 0.9992 |     |
|              | SN  | 0.8642; 0.9899                             |                                            | 0.1362; 0.9992 |     |
|              | THL | 0.9899; 0.9899                             |                                            | 0.6652; 0.9992 |     |
| <b>THL</b> → | THL | 0.7268; 0.9899                             |                                            | 0.8411; 0.9992 |     |
|              | CTX | 0.4178; 0.9899                             |                                            | 0.5950; 0.9992 |     |
| <b>CTX</b> → | CPu | 0.9805; 0.9899                             |                                            | 0.8147; 0.9992 |     |
|              | STN | 0.5898; 0.9899                             |                                            | 0.9883; 0.9992 |     |
|              | THL | 0.1915; 0.9899                             |                                            | 0.1248; 0.9992 |     |
|              | CTX | 0.9421; 0.9899                             |                                            | 0.0030; 0.0713 | cts |



**Table S4**

|              |     | D1- vs. D2-MSN stimulations (MCX)                 |     | D1- vs. D2-MSN stimulations (SCX)          |     |
|--------------|-----|---------------------------------------------------|-----|--------------------------------------------|-----|
|              |     | p-value (uncorrected); p-value (corrected)        |     | p-value (uncorrected); p-value (corrected) |     |
| <b>CPu</b> → | CPu | 8.2146×10 <sup>-4</sup> ; 0.0066                  | *   | 0.0013; 0.0118                             | *   |
|              | GPe | 0.4493; 0.5990                                    |     | 0.1819; 0.2911                             |     |
|              | GPi | 0.0046; 0.0276                                    | *   | 0.0015; 0.0118                             | *   |
|              | SN  | 3.0674×10 <sup>-5</sup> ; 7.3618×10 <sup>-4</sup> | *** | 0.0013; 0.0118                             | *   |
| <b>GPe</b> → | CPu | 0.5884; 0.6905                                    |     | 0.3779; 0.4535                             |     |
|              | GPe | 0.0099; 0.0460                                    | *   | 0.0436; 0.1308                             |     |
|              | GPi | 0.1839; 0.3153                                    |     | 0.3371; 0.4513                             |     |
|              | STN | 0.1554; 0.3124                                    |     | 0.1560; 0.2910                             |     |
|              | SN  | 0.6495; 0.6905                                    |     | 0.6730; 0.7023                             |     |
| <b>GPi</b> → | GPi | 0.1562; 0.3124                                    |     | 0.0156; 0.0623                             | cts |
|              | THL | 0.1127; 0.2704                                    |     | 0.0989; 0.2374                             |     |
| <b>STN</b> → | GPe | 0.5052; 0.6382                                    |     | 0.3716; 0.4535                             |     |
|              | GPi | 0.3338; 0.5007                                    |     | 0.3384; 0.4513                             |     |
|              | STN | 0.0166; 0.0568                                    | cts | 0.1576; 0.2910                             |     |
|              | SN  | 0.0820; 0.2460                                    |     | 0.0218; 0.0747                             | cts |
| <b>SN</b> →  | CPu | 0.1706; 0.3149                                    |     | 0.1818; 0.2911                             |     |
|              | SN  | 5.4954×10 <sup>-4</sup> ; 0.0066                  | *   | 0.0075; 0.0450                             | *   |
|              | THL | 0.1998; 0.3198                                    |     | 0.1248; 0.2723                             |     |
| <b>THL</b> → | THL | 0.9575; 0.9575                                    |     | 0.9271; 0.9271                             |     |
|              | CTX | 0.6068; 0.6905                                    |     | 0.4298; 0.4912                             |     |
| <b>CTX</b> → | CPu | 0.6617; 0.6905                                    |     | 0.3236; 0.4513                             |     |
|              | STN | 0.1111; 0.2704                                    |     | 0.0590; 0.1573                             |     |
|              | THL | 0.0115; 0.0460                                    | *   | 0.5819; 0.6348                             |     |
|              | CTX | 0.4119; 0.5815                                    |     | 0.0102; 0.0487                             | *   |

## **Supplemental Data Files**

**Data File S1, Related to Figure 1C.** Average time series (across subjects) corresponding to eight regions within the basal ganglia-thalamocortical network during D1-MSN stimulations. Each time series includes 30 s of baseline measurements, followed by six periods of 20 s stimulation delivered every minute. Each frame corresponds to 0.75 s.

**Data File S2, Related to Figure 1D.** Average time series (across subjects) corresponding to eight regions within the basal ganglia-thalamocortical network during D2-MSN stimulations. Each time series includes 30 s of baseline measurements, followed by six periods of 20 s stimulation delivered every minute. Each frame corresponds to 0.75 s.
